# Supplementary material for: Synthesis of SBA-15 rods with small sizes for enhanced cellular uptake
Source: Royal Society of Chemistry journal article supplement (doi:10.1039/c4tb00595c), 2014-01-01
Supplement: c4tb00595c1.pdf [file c4tb00595c1.pdf]

## Supporting information

### Synthesis of SBA-15 Rods with Small Sizes for Enhanced Cellular Uptake

Yannan Yang,<sup>a‡</sup> Surajit Karmakar,<sup>a‡</sup> Jun Zhang,<sup>a</sup> Meihua Yu,<sup>a</sup> Neena Mitter,<sup>b</sup> and Chengzhong Yu<sup>\*a</sup>

<sup>a</sup>*Australian Institute for Bioengineering and Nanotechnology, The University of Queensland, Brisbane, QLD 4072, Australia.*

*Fax: +61 7 3346 3973; Tel: +61 7 3346 3283; E-mail: c.yu@uq.edu.au*

<sup>b</sup>*Queensland Alliance for Agriculture and Food Innovation, The University of Queensland, Australia.*

‡ These authors contribute equally to this paper.

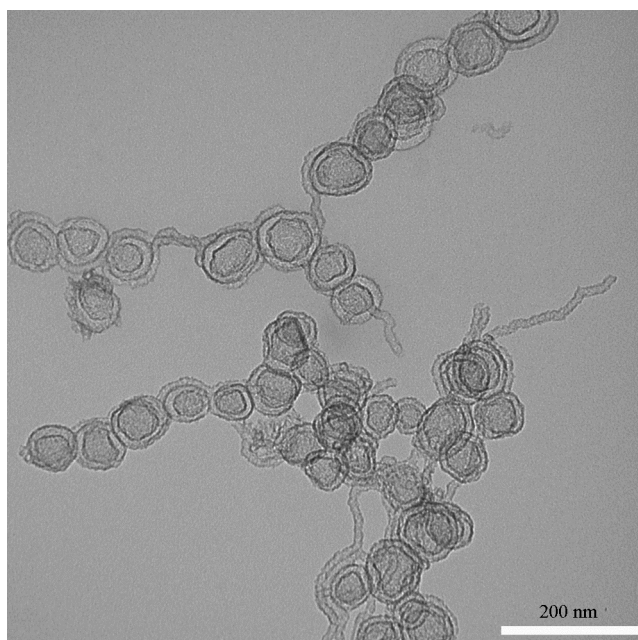

**Fig. S1** TEM image of vesicular structure obtained at pH=3.98 while keep the other synthesis conditions the same as SR-X samples.

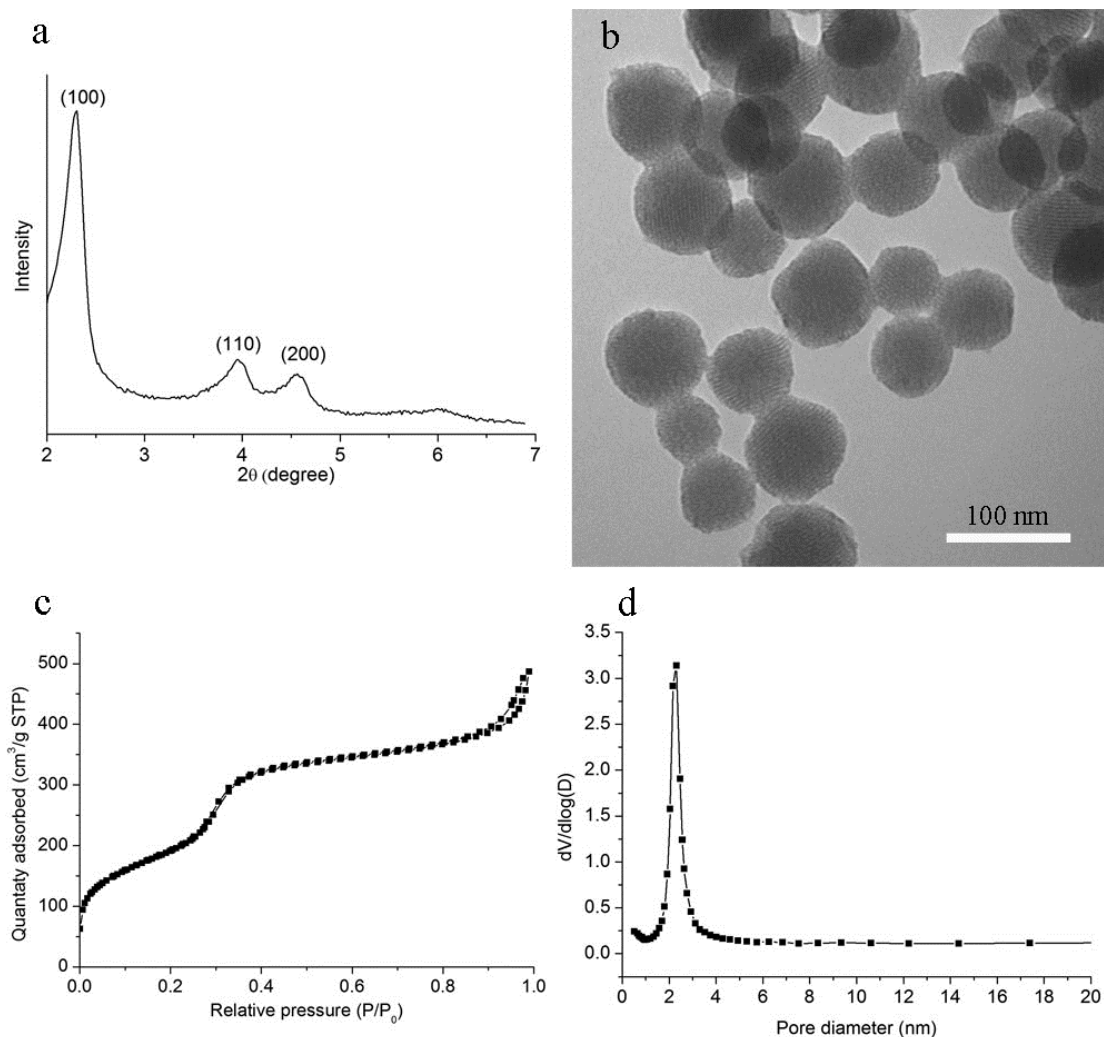

**Fig. S2** XRD pattern (a), TEM image (b), nitrogen sorption isotherm (c) and pore size distribution curve (d) of MCM-41.

MCM-41 was synthesized according to our previous report with slight modifications.<sup>1</sup> The XRD pattern (Fig.S2a) of MCM-41 shows three well-resolved diffraction peaks which can be assigned to the 100, 110 and 200 reflections of an ordered two dimensional (2D) hexagonal structure. The TEM image (Fig. S2b) displays that MCM-41 are spherical nanoparticles with particle sizes of 50-100 nm and well-ordered mesopores inside. The nitrogen adsorption-desorption plot of MCM-41 (Fig. S2c) exhibits a typical type IV isotherm and a steep capillary condensation step occurring at a relative pressure ( $P/P_0$ ) of  $\sim 0.3$ , corresponding to a narrow pore size distribution centred at 2.3 nm (Fig. S2d). The surface area, and pore volume of MCM41 is  $766 \text{ m}^2 \text{ g}^{-1}$  and  $0.76 \text{ cm}^3 \text{ g}^{-1}$ , respectively.

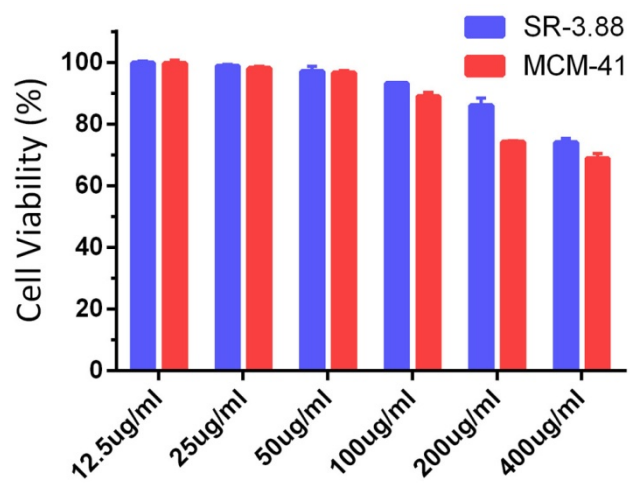

**Fig. S3** KHOS cell viability after 24 h incubation with various concentrations of SR-3.88 or MCM-41.

### References

1. S. Yang, L. Z. Zhao, C. Z. Yu, X. F. Zhou, J. W. Tang, P. Yuan, D. Y. Chen and D. Y. Zhao, *J. Am. Chem. Soc.*, 2006, 128, 10460-10466.
